# Supplementary material
Source: publisher figshare collection journal article supplement (https://acs.figshare.com/ndownloader/files/4748413)

## Supplementary Figure

Structural changes from initial models upon relaxation. Structural changes (arbitrary units) in the amino acid sequence from AtFd (solid lines) and AtFd3 (hashed lines) as a function of residue number

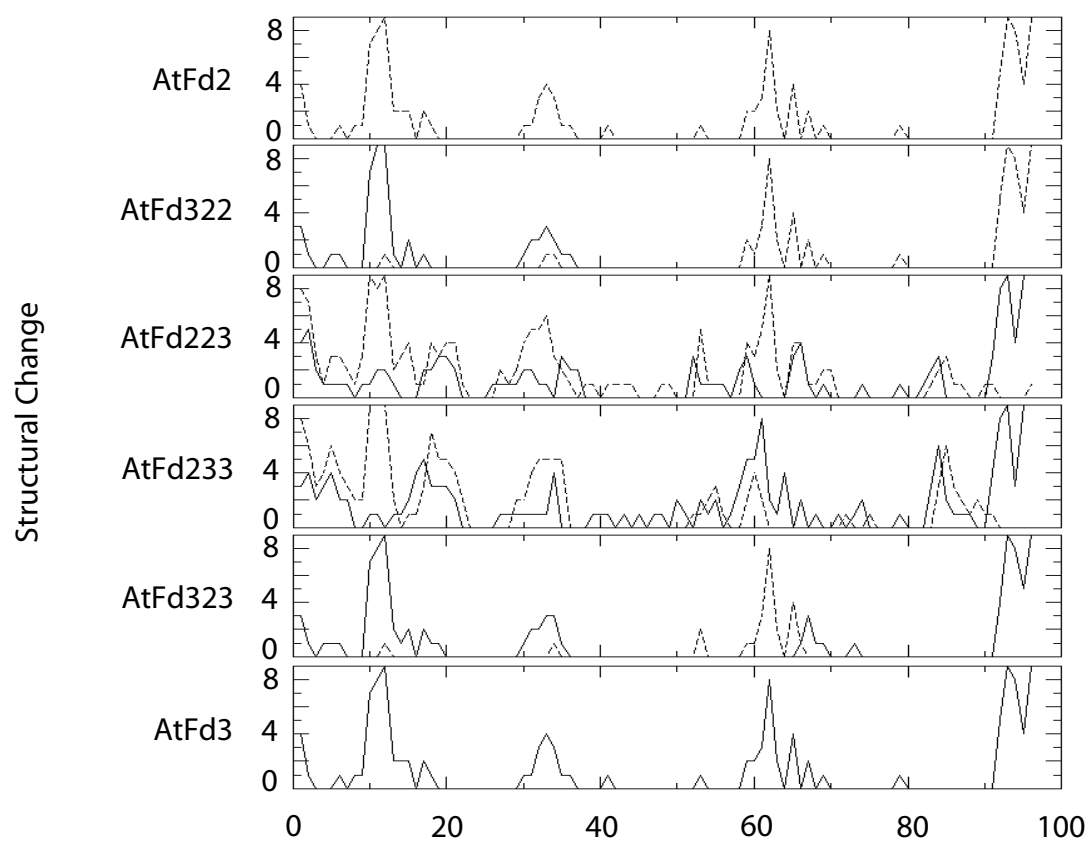

Supplement: Supplementary file 1 [file 4748413]
